# Supplementary material for: Synthesis and characterization of [Pb{Se2P(OiPr)2}2]n pseudo polymorphs: Polymeric, single source precursor enabling preparation of shape-controlled lead selenide structures
Source: Royal Society of Chemistry journal article supplement (doi:10.1039/b921503d), 2010-01-01
Supplement: b921503d.pdf [file b921503d.pdf]

## Supporting Information

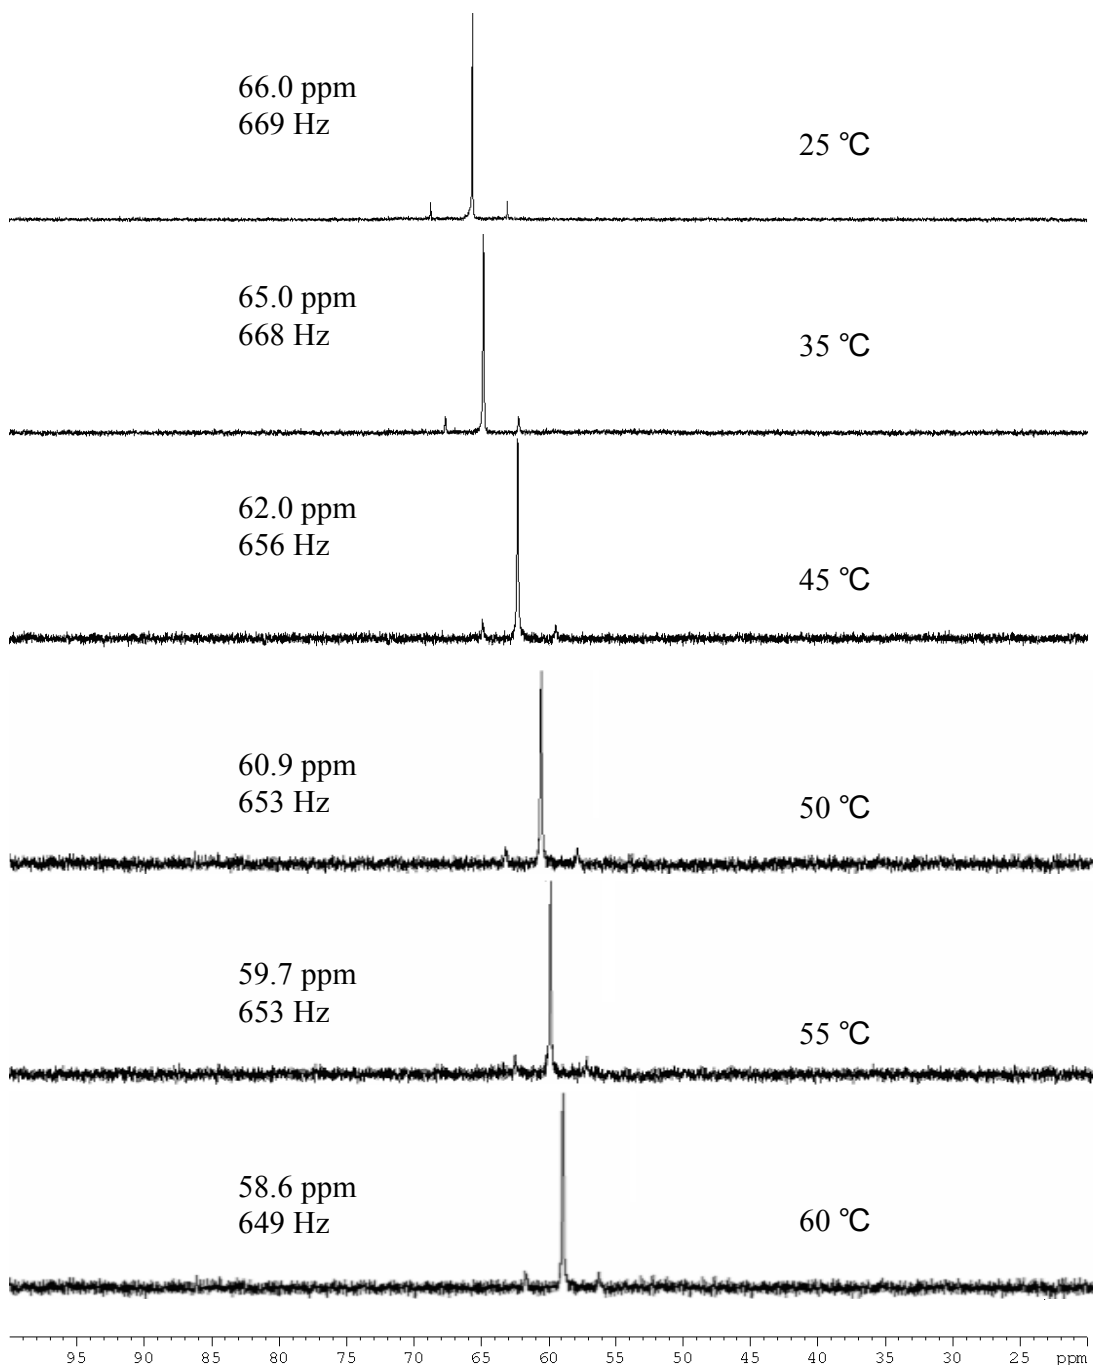

Figure S1. VT  $^{31}\text{P}$  NMR of compound **1a**.

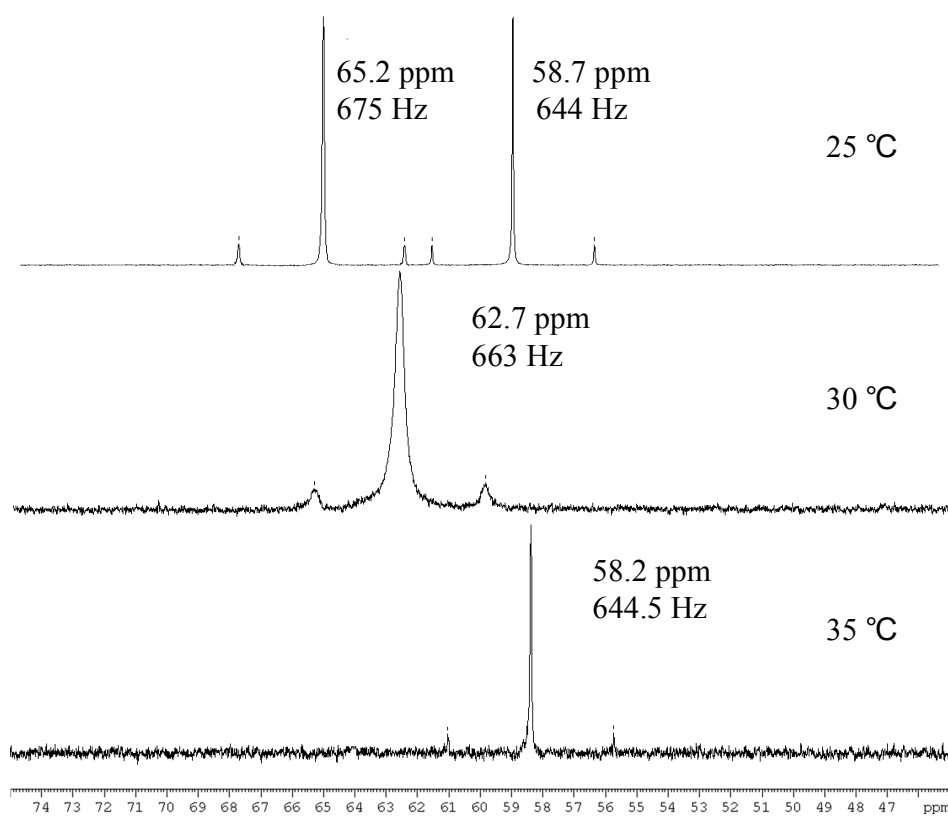

Figure S2. VT  $^{31}\text{P}$  NMR of a mixture of compound **1 $\alpha$**  and **1 $\beta$** .
